# Supplementary material
Source: PubMed Central journal article supplement (PMC515093)

### A. Constructs

E66 MSIVLIIVIVVIFLICFLYLSNSNNKNDANKNNAFID.....V  
701

E66-Δ33 M-----AFID.....V  
668

E66G M[NST]SQGSQGSQGELISQSIVLIIVIVVIFLICFLYLSNSNNKNDANKNNAFID.....V  
719

E66SM MSIVLIIVIVVIFLICFLYLSNSNNKNDANKNNAFI[lysine free sequence-HHHHHHH]  
136

E66-A12 MSIVLIIVIVV\*FLICFLYLSNSNNKNDANKNNAFID.....V  
701

### B E66G

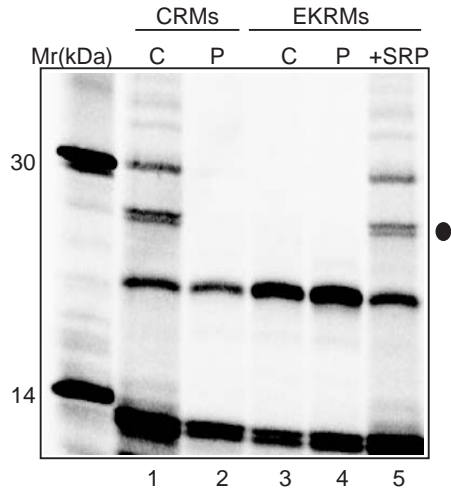

### C E66-A12

|                              |   |   |   |    |
|------------------------------|---|---|---|----|
| Lys-tRNA <sup>amb</sup>      | + | - | - | -  |
| εANB-Lys-tRNA <sup>amb</sup> | - | + | + | +  |
| UV light                     | + | - | + | +  |
| E66-A12                      | + | + | - | +  |
| E66-Δ33                      | - | - | + | -  |
|                              |   |   |   | IP |

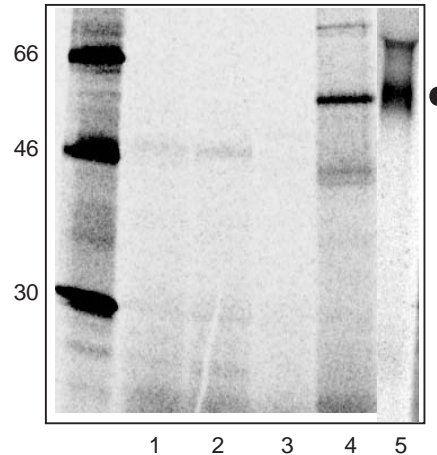

Supplement: pnas_101_34_12537__2.pdf [file pnas_101_34_12537__2.pdf]
