# Supplementary material
Source: PubMed Central journal article supplement (PMC515093)

Mr (kDa)

1

2

3

4

14 —

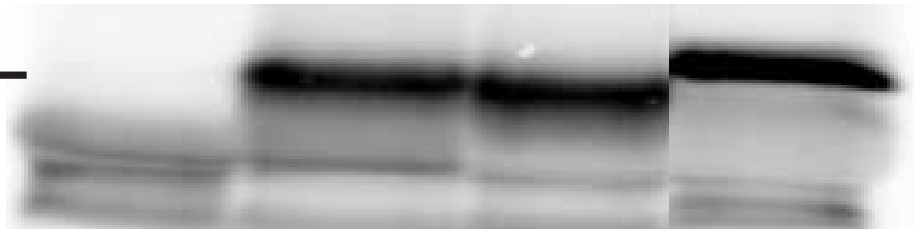

Length:

72

105

120

136

# of Methionines:

6

7

7

7

Supplement: pnas_101_34_12537__3.pdf [file pnas_101_34_12537__3.pdf]

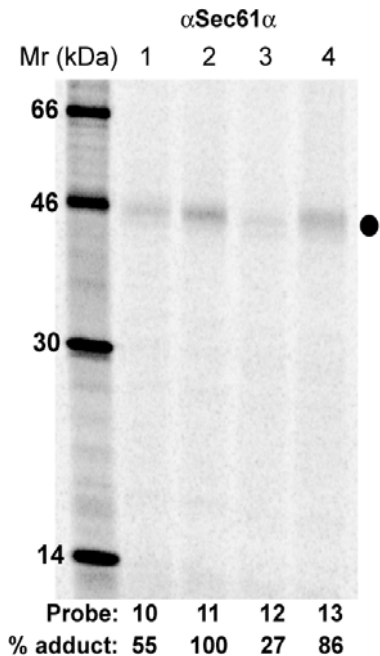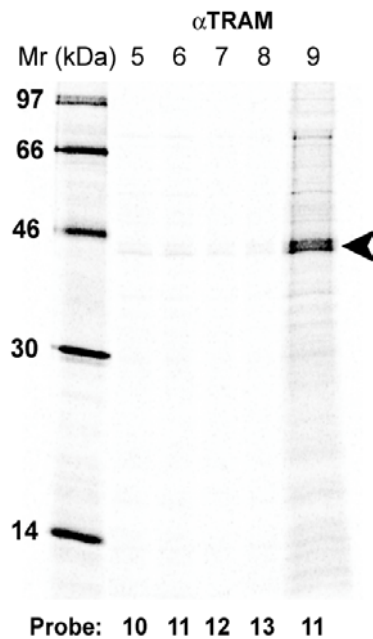

Supplement: pnas_101_34_12537__4.pdf [file pnas_101_34_12537__4.pdf]

**A.**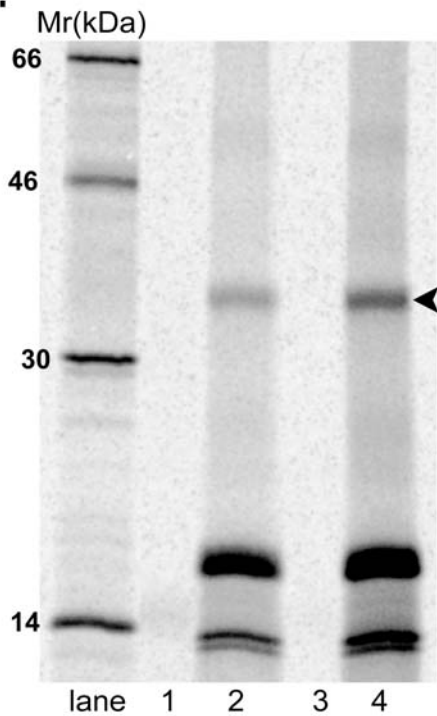**B.**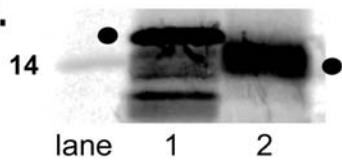

Supplement: pnas_101_34_12537__5.pdf [file pnas_101_34_12537__5.pdf]
